# Supplementary material for: Targeted Disruption of the Inhibitor of DNA Binding 4 (Id4) Gene Alters Photic Entrainment of the Circadian Clock
Source: MDPI journal article supplement (doi:10.3390/ijms22179632), 2021-09-06
Supplement: s1 [file s1]

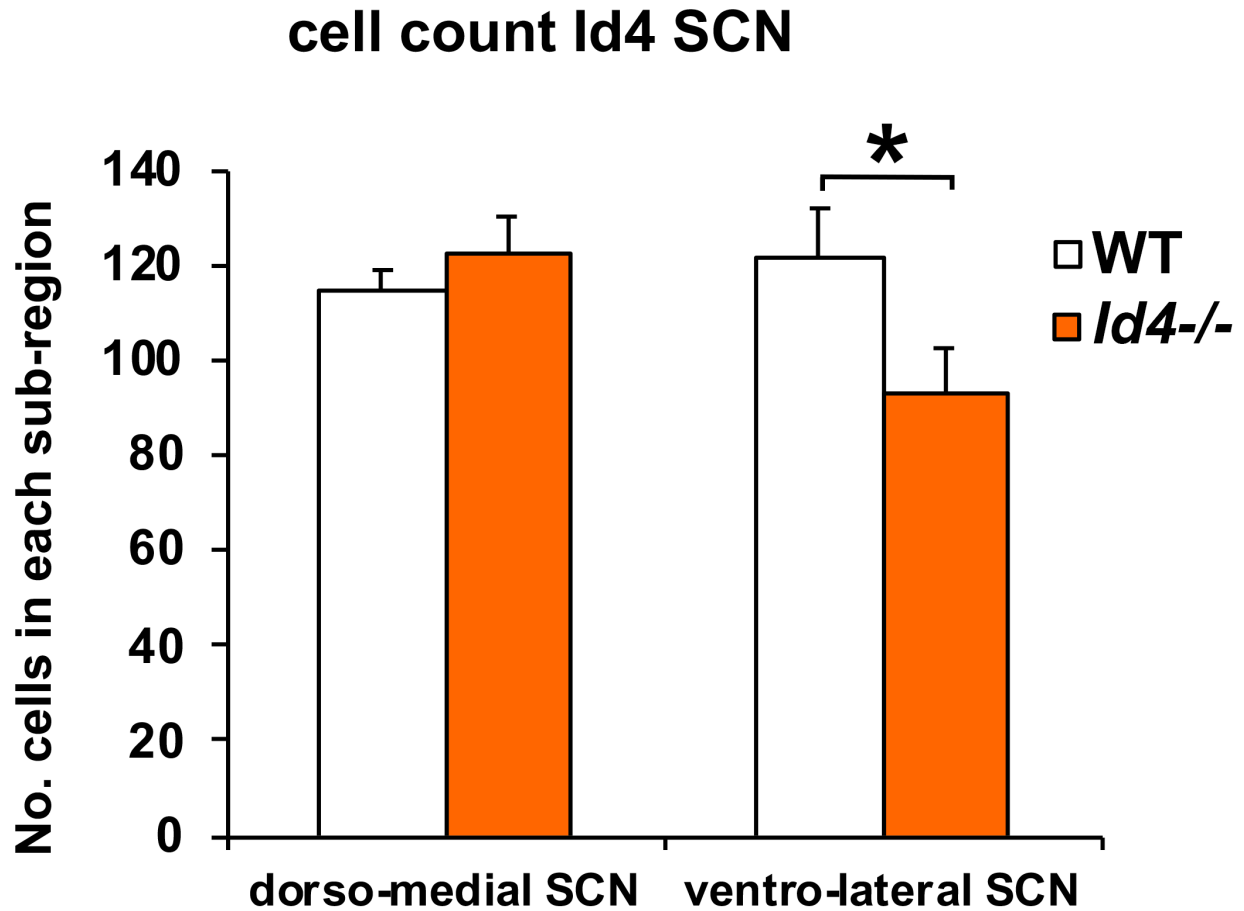

**Figure S2.** Cell count analysis of the suprachiasmatic nucleus (SCN) of wild-type and *Id4*<sup>-/-</sup> mice. Cells count analysis was performed on cresyl violet stained coronal sections in the dorsomedial and ventrolateral (retino-recipient) SCN regions using SCN-subregion templates. Values are group means  $\pm$  SEM for wild-type (WT) (white) and *Id4*<sup>-/-</sup> (orange) mice (wild type,  $n = 4$ ; *Id4*<sup>-/-</sup>,  $n = 4$ ). Significant differences were detected in cell density of SCN between genotypes in the ventrolateral region ( $*p < 0.05$ ). See Figure 5 for representative histological coronal sections through the SCN region of wild-type and *Id4*<sup>-/-</sup> mice.
