# Supplementary material for: Targeted Disruption of the Inhibitor of DNA Binding 4 (Id4) Gene Alters Photic Entrainment of the Circadian Clock
Source: MDPI journal article supplement (doi:10.3390/ijms22179632), 2021-09-06
Supplement: s1 [file s1]

**a**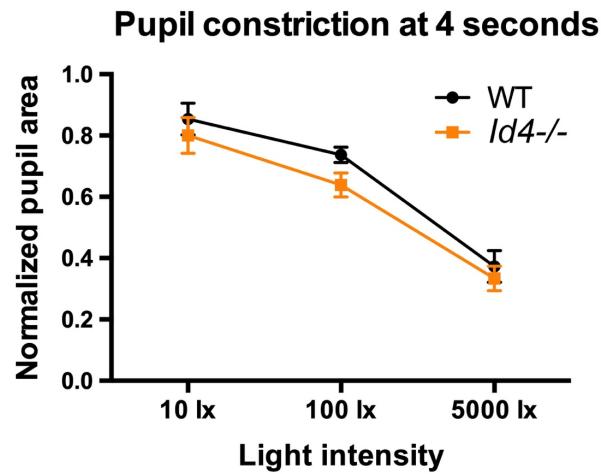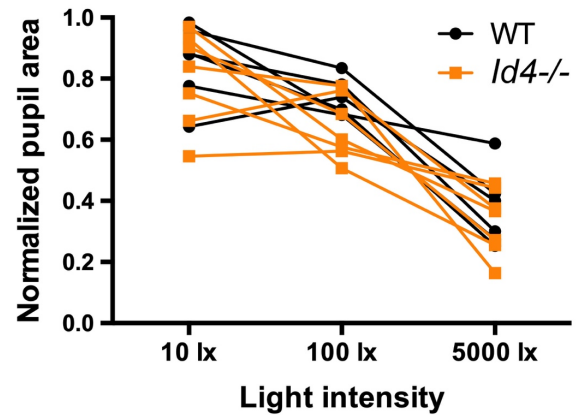**b**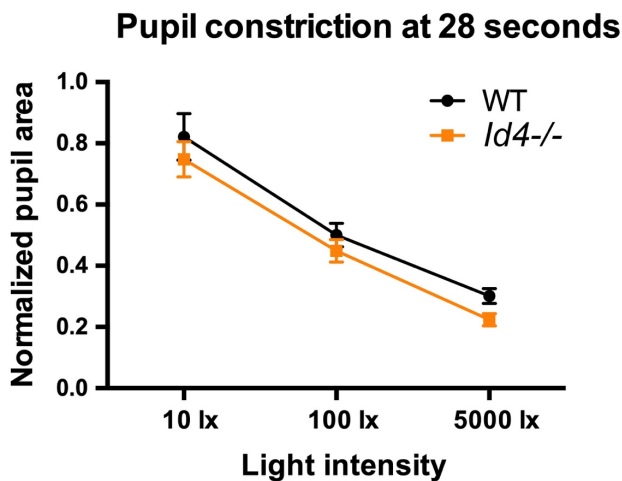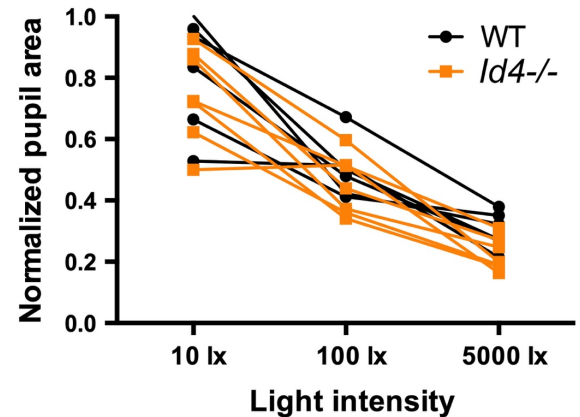

**Figure S3.** Pupil constriction responses of *Id4*<sup>-/-</sup> and wild-type mice analyzed at 4 seconds and 28 seconds after onset of light treatment. The response data at 4 and 28 seconds was examined specifically and compared at the three different light intensities (10, 100 and 5000 lx). Values are mean  $\pm$  SEM relative pupil diameter (wild type (WT),  $n = 6$ ; *Id4*<sup>-/-</sup>,  $n = 7$ ). No significant differences between genotypes were observed (Two-factor RM-ANOVAs at 4 sec and at 28 sec). See Figure 8 for wild-type and *Id4*<sup>-/-</sup> mice representative pupil constriction responses and pairwise genotypic comparisons at all time intervals.
